# Supplementary material
Source: Springer Nature journal article supplement (https://www.springermedizin.de/resource/supplementary/12885_2013_4784_MOESM3_ESM.pdf/9467296)
Supplement: MOESM3 [file 9467296]

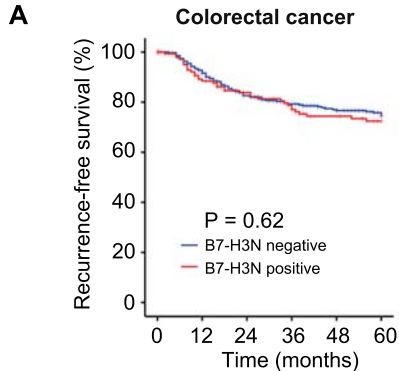

No. at risk:

|            |     |     |     |     |     |     |
|------------|-----|-----|-----|-----|-----|-----|
| B7-H3N neg | 400 | 311 | 257 | 226 | 199 | 166 |
| B7-H3N pos | 162 | 122 | 103 | 91  | 78  | 68  |

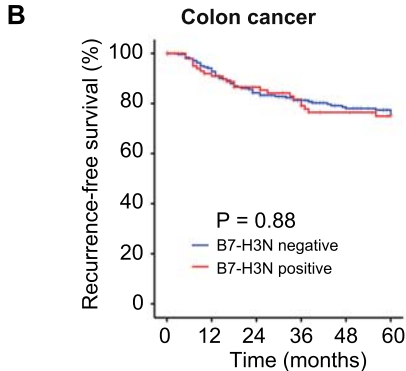

No. at risk:

|            |     |     |     |     |     |     |
|------------|-----|-----|-----|-----|-----|-----|
| B7-H3N neg | 283 | 216 | 179 | 159 | 139 | 119 |
| B7-H3N pos | 119 | 90  | 73  | 63  | 53  | 48  |

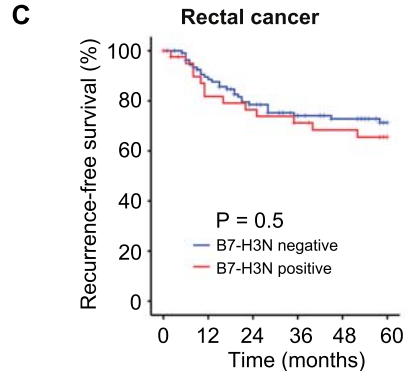

No. at risk:

|            |     |    |    |    |    |    |
|------------|-----|----|----|----|----|----|
| B7-H3N neg | 114 | 92 | 75 | 64 | 57 | 44 |
| B7-H3N pos | 42  | 31 | 29 | 26 | 24 | 19 |

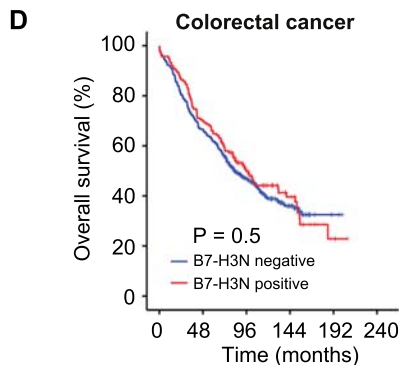

No. at risk:

|            |     |     |     |    |   |   |
|------------|-----|-----|-----|----|---|---|
| B7-H3N neg | 400 | 266 | 142 | 46 | 3 | 0 |
| B7-H3N pos | 162 | 113 | 57  | 23 | 3 | 0 |

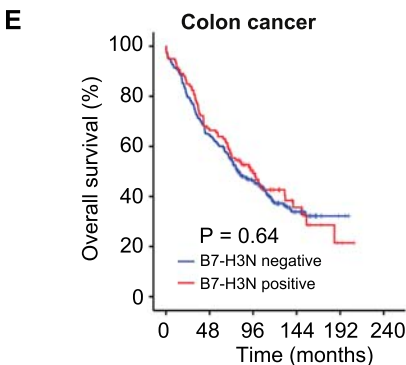

No. at risk:

|            |     |     |     |    |   |   |
|------------|-----|-----|-----|----|---|---|
| B7-H3N neg | 283 | 183 | 100 | 31 | 3 | 0 |
| B7-H3N pos | 119 | 79  | 41  | 13 | 2 | 0 |

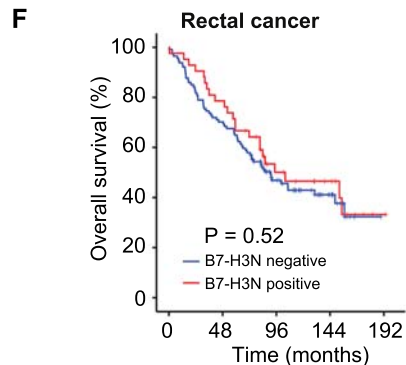

No. at risk:

|            |     |    |    |    |   |
|------------|-----|----|----|----|---|
| B7-H3N neg | 114 | 80 | 39 | 15 | 0 |
| B7-H3N pos | 42  | 33 | 15 | 9  | 1 |
